# Supplementary material for: Re-positive of SARS-CoV-2 test is common in COVID-19 patients after hospital discharge. Data from high standard post-discharge quarantined patients in Macao SAR, China
Source: PeerJ. 2021 Apr 23;9:e11170. doi: 10.7717/peerj.11170 (PMC8074836; doi:10.7717/peerj.11170)
Supplement: Supplemental Information 1 [file peerj-09-11170-s001.xlsx]

## Sheet: 工作表1
Case No	Gender (Female=1)	Age	Nationality	Travel history	S/S before hospitalization (Yes=1)	Classification when admission (Asymptomatic type=0, Mild type=1, Moderate type=2)	Classification during hospitalization (Asymptomatic type=0, Mild type=1, Moderate type=2, Severe type=3, Critical=4)	Past medical history (Yes=1)	CRP	PCT	CT when admission (Normal=1, Pneumonia=2)	Lopinavir / ritonavir (2 weeks=1, 3 weeks=2)	Interferon (Used=1)	Azithromycin (Used=1)	Levofloxacin (Used=1)	Methylprednisolone (Used=1)	Hydroxychloroquine (Used=1)	S/S onset to diagnosis	S/S onset to hospital discharge	Diagnosis to hospital discharge	re-positive (Yes=1)
1	1	26	Korean	Portugal	1	1	1	2	0.21	0.03	1	1	2	1	2	2	2	1	63	62	1
2	2	47	Spanish	Spain	1	1	3	2	1.88	0.08	1	2	1	1	2	2	2	0	27	27	2
3	1	20	Chinese	England	1	1	2	2	1.15	0.05	1	2	2	1	2	2	2	0	41	41	2
4	1	42	Indonesia	Indonesia	1	1	2	2	0.97	0.06	1	2	1	1	1	2	2	1	40	39	2
5	2	31	Filipino	Philippines	1	1	1	2	1.27	0.05	1	2	2	1	2	2	2	1	26	25	1
6	1	19	Chinese	England	2	0	0	2	0.05	0.02	1	2	2	1	2	2	2			33	2
7	2	11	Indonesia	Indonesia	1	1	1	2	0.02	0.03	1	2	2	1	2	2	2	1	39	38	2
8	1	50	Chinese	America	1	2	4	2	21.83	0.5	2	1	1	1	1	1	1	2	43	41	1
9	2	19	Chinese	America	1	1	1	2	0.04	0.03	1	2	2	1	2	2	2	7	33	26	1
10	2	20	Portuguese	England	2	0	0	2	0.15	0.03	1	2	2	1	2	2	2			39	2
11	1	19	Chinese	England	1	1	1	2	0.3	0.03	1	2	2	1	2	2	2	0	49	49	1
12	2	44	Chinese	Ireland	1	2	2	1	1.97	0.06	2	2	1	1	1	2	2	8	46	38	1
13	2	12	Chinese	England	1	1	1	2	0.15	0.08	1	1	2	1	2	2	2	4	55	51	1
14	2	21	Chinese	England	1	1	1	2	0.13	0.04	1	2	2	1	2	2	2	6	34	28	2
15	2	41	Indonesia	Indonesia	1	1	3	2	10.26	0.07	1	2	1	1	1	1	1	6	50	44	2
16	1	17	Portuguese	England	1	1	1	2	0.04	0.02	1	2	2	1	2	2	2	7	35	28	2
17	2	28	Chinese	England	1	2	2	2	0.38	0.07	2	2	1	1	1	2	2	4	52	48	2
18	2	18	Chinese	England	1	2	2	2	0.69	0.06	2	2	1	1	1	2	2	2	24	22	1
19	1	15	Chinese	England	1	1	1	2	0.09	0.04	1	2	2	1	2	2	2	5	60	55	1
20	2	52	Australian	England	2	2	2	1	3.07	0.08	2	2	1	1	1	2	2			32	2
21	2	27	Chinese	America	1	1	1	2	0.08	0.02	1	1	2	1	2	2	2	12	29	17	2
22	2	35	Filipino	Philippines	1	2	2	2	0.32	0.06	2	2	2	1	2	2	2	2	40	38	1
23	1	37	Filipino	Philippines	2	2	2	2	0.44	0.05	2	2	2	1	2	2	2			27	1
24	2	43	Chinese	Philippines	1	2	2	2	0.12	0.05	2	1	2	1	2	2	2	4	29	25	2
25	2	19	Chinese	England	1	2	2	2	2.08	0.03	2	2	1	1	1	2	2	4	21	17	2
26	2	21	Chinese	Portugal	1	2	2	2	0.66	0.04	2	1	2	1	2	2	2	11	28	17	2
27	2	33	Portuguese	Portugal	1	1	1	2	0.18	0.03	1	2	2	1	2	2	2	12	38	26	2
28	2	44	Chinese	England	1	2	2	1	2.64	0.12	2	1	1	1	1	2	2	2	26	24	2
29	1	9	Chinese	Philippines	2	0	0	2	0.03	0.03	1	1	2	1	2	2	2			20	2
30	1	47	Chinese	England	1	2	2	2	0.07	0.02	2	2	1	1	1	2	1	0	21	21	1
31	2	20	Chinese	England	2	2	2	2	0.91	0.03	2	1	1	1	1	2	1			31	2
32	2	58	Chinese	Thailand	1	2	2	1	0.32	0.02	2	1	2	2	2	2	1	17	42	25	2
33	1	53	Chinese	Portugal	2	2	2	2	0.02	0.03	2	1	2	2	2	2	1			16	2
34	2	52	Chinese	England	1	2	2	1	1.98	0.05	2	1	2	2	2	2	1	2	22	20	2
35	2	32	Chinese	Cambodia	1	1	1	1	0.04	0.02	1	1	2	1	2	2	2	20	44	24	2

## Sheet: 工作表2
0.08	0.21	0.31
0.05	1.27		0.03
0.06	21.83
0.02	0.04
0.03	0.3
0.03	1.97
0.04	0.15
0.07	0.69
0.02	0.09
0.07	0.32
0.08	0.44
0.02	0.07
0.05
0.03
0.04
0.03
0.12
0.03
0.03
0.02
0.03
0.05
0.02
